# Supplementary material
Source: PubMed Central journal article supplement (PMC3838951)
Supplement: NIHMS55708-supplement-suppl_mat.pdf [file NIHMS55708-supplement-suppl_mat.pdf]

## Supplemental Information

Sensory processing during viewing of cinematographic material: computational modeling and functional neuroimaging

Cécile Bordier, Francesco Puja, Emiliano Macaluso

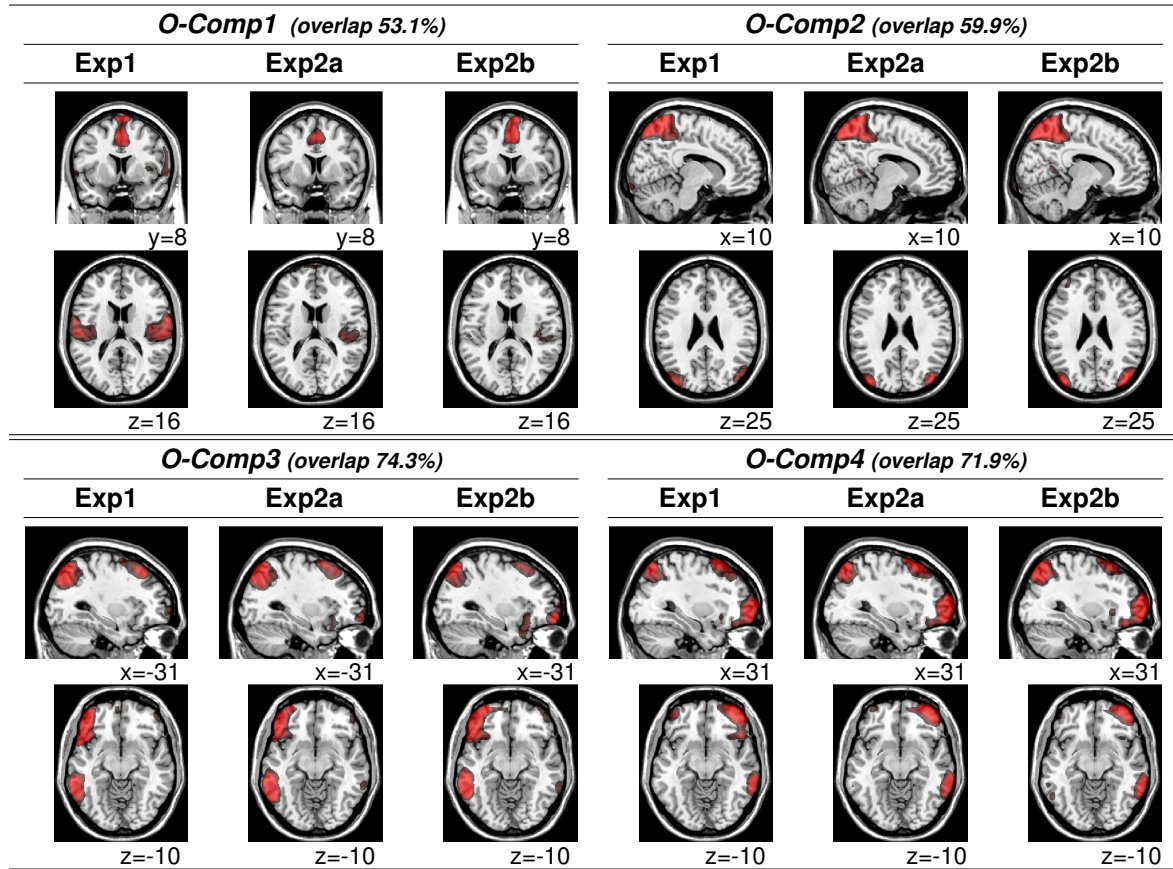

**Figure S1.** First set of other ICA components (O-comp 1-4) including high-level associative areas that - together with the three sensory components (see Fig. 5) - we could identify consistently in all three datasets. For each component, we report a % overlap index that quantifies the degree of spatial overlap between the three datasets (see Methods, for details). The display threshold is  $p\text{-unc.} = 0.001$ . Images are in neurological convention.

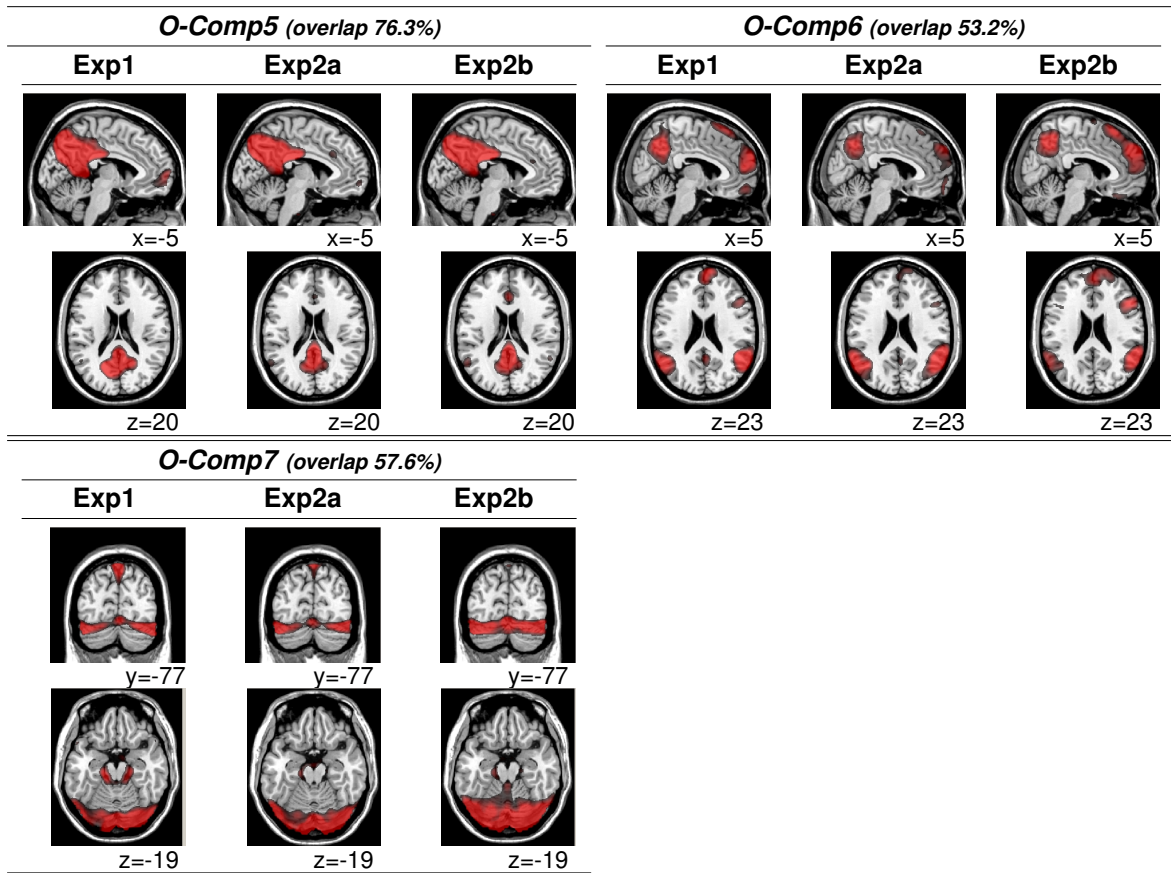

**Figure S1bis.** Second set of other ICA components (O-comp 5-7).

|                                                                                               | Color                                                                                                                                                              | Intensity         | Orientation                                                                                         | Motion                                     | Flicker               |
|-----------------------------------------------------------------------------------------------|--------------------------------------------------------------------------------------------------------------------------------------------------------------------|-------------------|-----------------------------------------------------------------------------------------------------|--------------------------------------------|-----------------------|
| Initial map                                                                                   | [1]                                                                                                                                                                | [1,2]             | [3,4]                                                                                               | [4]                                        |                       |
|                                                                                               | R-G: $(r - g)/\max(r, g, b)$<br>B-Y: $(b - \min(r, g))/\max(r, g, b)$                                                                                              | $(r + g + b) / 3$ |                                                                                                     | Intensity $n - (n-1)$ ,<br>shifted by 1 px | Intensity $n - (n-1)$ |
| Gaussian pyramids [2,5]                                                                       | Pyramids levels = 9, sub-sampling by a factor of two: i.e. $2^{\text{sigma}}$ , with $\text{sigma} = 0-8$<br>Gaussian filter: $\text{sigma} = 1$ px; size = 6x6 px |                   |                                                                                                     |                                            |                       |
|                                                                                               | Gabor [1,6].<br>angles = $0^\circ 45^\circ 90^\circ 135^\circ$<br>phase = $0^\circ 90^\circ$<br>period = 7 px                                                      |                   | elongation=1<br>size= 9x9 px<br>sigma= 7/3 px                                                       |                                            |                       |
| Cross-scale subtraction [1,4]                                                                 | Resample to level $\text{sigma} = 4$<br>Subtractions: 5-2, 6-2, 6-3, 7-3, 7-4, 8-4                                                                                 |                   |                                                                                                     |                                            |                       |
| Iterative normalization [7] (not for "un-normalized conspicuity" maps used for fMRI analyses) | Scale to range: 0-10<br>DoG filter:<br>Number iterations = 4<br>$C_{\text{ex}} = 0.5$<br>$C_{\text{inh}} = 1.5$                                                    |                   |                                                                                                     |                                            |                       |
|                                                                                               |                                                                                                                                                                    |                   | $C_{\text{inh}} = 0.02$<br>$\text{sigma}_{\text{ex}} = 1$ px<br>$\text{sigma}_{\text{inh}} = 11$ px |                                            |                       |
| Across-scales addition [2]                                                                    | Point-wise sum of normalized (or un-normalized) maps                                                                                                               |                   |                                                                                                     |                                            |                       |
| Weight each feature (divided by the number of maps for each feature, cf. main text)           |                                                                                                                                                                    |                   |                                                                                                     |                                            |                       |
|                                                                                               | 1                                                                                                                                                                  | 1                 | 1                                                                                                   | 1                                          | 1                     |
| Iterative normalization [7]                                                                   | DoG filter: parameters as above                                                                                                                                    |                   |                                                                                                     |                                            |                       |
| Addition [2]                                                                                  | Point-wise sum of the normalized conspicuity maps                                                                                                                  |                   |                                                                                                     |                                            |                       |
| Iterative normalization [7]                                                                   | Scale to range: 0-2<br>DoG filter: parameters as above                                                                                                             |                   |                                                                                                     |                                            |                       |

**Tab. S1:** Visual saliency. Step-by-step description of the visual saliency model, including the specific parameters used in the current study and references to previous work (see list below) reporting the mathematical formulae to compute each step. Filters parameters are given in pixels (px). The labeling of the DoG (Difference of Gaussians) parameters follows the nomenclature used in ref [7]. r/g/b/Y: red/green/blue/Yellow.

|                                                                                                                                                                    | Intensity                                                                    | Frequency                                      | Temporal                                                                      | Orientation                                   |
|--------------------------------------------------------------------------------------------------------------------------------------------------------------------|------------------------------------------------------------------------------|------------------------------------------------|-------------------------------------------------------------------------------|-----------------------------------------------|
| Initial map (spectrogram) <sup>[8]</sup>                                                                                                                           |                                                                              |                                                |                                                                               |                                               |
| Sub-sampling (44100 to 22050 Hz)<br>Fast Fourier Analysis<br>Window = 37 ms; overlap = 95 %; frequency band = 100 Hz - 10 kHz                                      |                                                                              |                                                |                                                                               |                                               |
| Gaussian pyramids <sup>[5,9]</sup>                                                                                                                                 |                                                                              |                                                |                                                                               |                                               |
| Pyramids levels = 8, sub-sampling by a factor of two: i.e. $2^{\text{sigma}}$ , with $\text{sigma} = 0-7$<br>Gaussian filter: $\text{sigma} = 1$ px, size = 6x6 px |                                                                              |                                                |                                                                               |                                               |
|                                                                                                                                                                    | Gabor <sup>[9,10]</sup> :<br>angles = 0°<br>phase = 0° 90°<br>period = 15 px | elongation=1<br>size= 11x11 px<br>sigma = 3 px | Gabor <sup>[9,10]</sup> :<br>angles = 90°<br>phase = -90° 0°<br>period = 8 px | elongation=1<br>size= 10x10 px<br>sigma =3 px |
| Gabor <sup>[9]</sup> :<br>angles = 45°, 135°<br>phase = 0° 90°<br>period = 15 px                                                                                   |                                                                              |                                                |                                                                               |                                               |
| elongation = 1<br>size= 11x11 px<br>sigma = 3 px                                                                                                                   |                                                                              |                                                |                                                                               |                                               |
| Cross-scale subtraction <sup>[9,10]</sup>                                                                                                                          |                                                                              |                                                |                                                                               |                                               |
| Resample to level $\text{sigma} = 3$<br>Subtractions: 5-2, 6-2, 6-3, 7-3                                                                                           |                                                                              |                                                |                                                                               |                                               |
| Iterative normalization <sup>[7,9,11]</sup> (not for "un-normalized conspicuity" maps used for fMRI analyses)                                                      |                                                                              |                                                |                                                                               |                                               |
| Scale to range: 0-10<br>DoG filter:<br>Number iterations = 4<br>$C_{\text{ex}} = 0.5$<br>$C_{\text{inh}} = 1.5$<br>$C_{\text{inh}} = 0.02$                         |                                                                              |                                                |                                                                               |                                               |
| For frequency domain:<br>$\text{sigma}_{\text{ex}} = 1$ px<br>$\text{sigma}_{\text{inh}} = 1$ px                                                                   |                                                                              |                                                |                                                                               |                                               |
| For temporal domain:<br>$\text{sigma}_{\text{ex}} = 6$ px<br>$\text{sigma}_{\text{inh}} = 6$ px                                                                    |                                                                              |                                                |                                                                               |                                               |
| Across-scales addition <sup>[9]</sup>                                                                                                                              |                                                                              |                                                |                                                                               |                                               |
| Point-wise sum of normalized (or un-normalized) maps                                                                                                               |                                                                              |                                                |                                                                               |                                               |
| Weight each feature (divided by the number of maps for each feature, cf. main text)                                                                                |                                                                              |                                                |                                                                               |                                               |
|                                                                                                                                                                    | 1                                                                            | 1                                              | 1                                                                             | 1                                             |
| Iterative normalization <sup>[7,9,11]</sup>                                                                                                                        |                                                                              |                                                |                                                                               |                                               |
| DoG filter: parameters as above                                                                                                                                    |                                                                              |                                                |                                                                               |                                               |
| Addition <sup>[1,2,9]</sup>                                                                                                                                        |                                                                              |                                                |                                                                               |                                               |
| Point-wise sum of the normalized conspicuity maps                                                                                                                  |                                                                              |                                                |                                                                               |                                               |

**Tab. S2:** Auditory saliency. Step-by-step description of the auditory saliency model, including the specific parameters used in the current study and references to previous work (see list below) reporting the mathematical formulae to compute each step. Filters parameters are given in pixels (px). The labeling of the DoG parameters follows the nomenclature used in ref [7].

## Reference List for Tabs S1-S2

- [1] Walther, D., Koch, C., 2006. Modeling attention to salient proto-objects. *Neural Networks* 19, 1395-1407.
- [2] Itti, L., Koch, C., Niebur, E., 1998. A model of saliency-based visual attention for rapid scene analysis. *Pattern Analysis and Machine Intelligence, IEEE Transactions* 20, 1254-1259.
- [3] Reichardt, W., 1987. Evaluation of optical motion information by movement detectors. *Journal of comparative physiology A, Sensory, neural, and behavioral physiology* 161, 533-547.
- [4] Itti, L., Pighin, F., 2003. Realistic avatar eye and head animation using a neurobiological model of visual attention. In *Proceedings of SPIE 48th Annual International Symposium on Optical Science and Technology* 5200, 64-78.
- [5] Greenspan, H., Belongie, S., Goodman, R., Perona, P., Rakshit, S., Anderson, C.H., 1994. Overcomplete steerable pyramid filters and rotation invariance. In *Proceedings of the IEEE Conference on Computer Vision and Pattern Recognition*, 222-228.
- [6] Daugman, J.G., 1985. Uncertainty relation for resolution in space, spatial frequency, and orientation optimized by two-dimensional visual cortical filters. *Journal of the Optical Society of America A: Optics, Image Science, and Vision* 2, 1160-1169.
- [7] Itti, L., Koch, C., 2000. A saliency-based search mechanism for overt and covert shifts of visual attention. *Vision research* 40, 1489-1506.
- [8] Shamma, S., 2001. On the role of space and time in auditory processing. *Trends in Cognitive Sciences* 5, 340-348.
- [9] Kalinli, O., Narayanan, S.S., 2007. A saliency-based auditory attention model with applications to unsupervised prominent syllable detection in speech. In *Proceedings of InterSpeech*, 1941-1944.
- [10] Kayser, C., Petkov, C., Lippert, M., Logothetis, N., 2005. Mechanisms for Allocating Auditory Attention: An Auditory Saliency Map. *Current biology* 15, 1943-1947.
- [11] Itti, L., Koch, C., 2001. Feature combination strategies for saliency-based visual attention systems. *J. of Electronic Imaging* 10, 161–169.
